1 **sgRNA level determines CRISPRi knockdown efficiency in K562 cells**

2 Yu Wang, Zhicheng Dong, Xuanjing Jiang, Pei Gong, Jing Lu, and Fang Wan

3

4 College of Life Sciences, Inner Mongolia Agricultural University, Erdos east street,

5 Hohhot 010010, Inner Mongolia, China

6 E-mail: [fwan@imau.edu.cn](mailto:fwan@imau.edu.cn)

7

8 **Abstract**

9 To determine whether nuclease deactivated Cas9 (dCas9) or sgRNA expression level or  
10 both determine the knockdown efficiency of CRISPRi, we carried out the following  
11 experiments: Cell clones expressing KRAB-dCas9 either under the control of the  
12 inducible Tet-on system or SFFV promotor were created by lentiviral transduction, and  
13 several single clones were selected by fluorescence-activated cell sorting (FACS) for  
14 further study. Six genes with various expression levels were targeted using lentiviral  
15 sgRNA from two libraries, and the only clone with the high expression level of  
16 KRAB-dCas9 effectively knocked down target gene expression. In the high  
17 KRAB-dCas9 expressing cell clone, the knockdown efficiency was neither affected by  
18 the target gene expression level nor does it correlate with the KRAB-dCas9 expression  
19 level, which remained relatively constant (CV=2.2%) across knockdown experiments.  
20 74.72%, 72.28%, 39.08% knockdown of MMADHC, RPIA, ZNF148 genes were

21 achieved, and the knockdown efficiency correlated well with the sgRNA expressing  
22 level, which is controlled by a different multiplicity of infection (MOI). Cell clones with  
23 low KRAB-dCas9 expression levels did not achieve high knockdown efficiency.

24

25 **Keywords:** CRISPR interference, knockdown efficiency, inducible Tet-on system, the  
26 multiplicity of infection, sgRNA expression level

27

## 28 **1. Introduction**

29 CRISPRi is gradually replacing the siRNA technique for mechanistic investigations in  
30 various fields [1]. However, there is a lack of mechanistic study on the efficiency of the  
31 CRISPRi system. How the two major players of the system, the dCas9 fusion protein,  
32 and the guide RNA affect the knockdown efficiency has not been systematically  
33 studied.

34 Three protein domains were commonly used for repressing target gene transcription:  
35 KRAB, MeCP2, dCas9 and its synthetic derivatives [2-3]. KRAB recruits KAP1, which  
36 serves as a scaffold for various heterochromatin-inducing factors [4]; MeCP2 binds to  
37 the methylated DNA and interacts with histone deacetylase and the co-repressor SIN3A  
38 [5]. A combination of dCas9 with KRAB and MeCP2 has been shown to improve the  
39 knockdown efficiency [2-3], and dCas9, KRAB-dCas9, dCas9-KRAB-MeCP2 are three  
40 commonly used combinations.

41 Effective knockdown of target gene expression started from the sgRNA being expressed  
42 from the transgene, formed a complex with KRAB-dCas9 protein, and roaming in the  
43 nucleus until the sgRNA hybrid to target DNA [6]. Previously inducible KRAB-dCas9  
44 has been reported [2], but how knockdown efficiency was affected by dCas9 fusion  
45 protein or sgRNA expression level has not been studied systematically. In this study, we  
46 found that the dCas9 protein level has to be highly expressed for an efficient  
47 knockdown, and the knockdown efficiency correlated well with the sgRNA expressing  
48 level.

49

## 50 **2. Materials and methods**

### 51 **2.1. Cell culture**

52 HEK293T and K562 cells were obtained from the National Infrastructure of Cell Line  
53 Resource. HEK293T cells were cultured at 37 °C in Dulbecco's modified Eagle's  
54 medium containing 4.5 g/L glucose supplemented with 10% (v/v) Fetal Bovine Serum  
55 (FBS). K562 cells were maintained in Iscove's modified Dulbecco's medium  
56 supplemented with 10% FBS. Cells were tested every 3 months for mycoplasma  
57 contamination and consistently tested negative.

### 58 **2.2. Construction of plasmids**

59 The pTRE3G promoter was PCR-amplified with the primers using the pTRE3G plasmid  
60 as a template. The PCR product was digested with EcoRI and ligated into EcoRI  
61 digested pHR-SFFV-KRAB-dCas9 vector (Addgene, 60954), to generate a

62 pHR-pTRE3G-KRAB-dCas9 vector. Two complementary oligonucleotides were  
63 annealed and inserted into the BstXI and BlnI sites of the linearized pCRISPRia-v2  
64 vector (Addgene, 84832) using T4 DNA ligase. Oligonucleotides are listed in  
65 Supplementary Table 1. Primers are listed in Supplementary Table 2.

### 66 **2.3. Transfection and transduction**

67 For transfection,  $2.1 \times 10^7$  HEK293T cells were seeded into T175 flasks 1d before  
68 transfection. Cells were transfected with pSPAX2, pMD2.G, Tet3G/dCas9/sgRNA  
69 plasmid (4:1:4, mole ratio) using PEI (1 mg/mL) with N/P ratio was 20 [2, 7]. Viral  
70 supernatants were collected at 48 h and 72 h after transfection. For lentiviral  
71 concentration, the cell culture supernatant was filtered using 0.45  $\mu$ m filters. 4 mL 20%  
72 sucrose solution was added to the bottom of the ultracentrifuge tube with 32 mL filtered  
73 cell culture supernatant, centrifuge for 2 h at 82,700 g, 4 °C [8], and the supernatant was  
74 disinfected and discarded. 100  $\mu$ L of pre-cooled PBS without  $\text{Ca}^{2+}/\text{Mg}^{2+}$  was added to  
75 resuspend the pellet. The titer of the lentiviral vector was determined by fluorescence  
76 titering assay. For transduction,  $1 \times 10^5$  K562 cells were infected with a mixture of  
77 lentivirus and 10  $\mu$ g/mL polybrene.

### 78 **2.4. FACS and antibiotics selection**

79 To generate KRAB-dCas9-mCherry-expressing stable cell lines, cells were analyzed  
80 based on the expression of mCherry by BD FACS Aria II and sorted into 96-well plates.  
81 After cell clones expanded, positive cells expressing mCherry were confirmed by flow  
82 cytometry using CytoFLEX S. For the selection of cells expressing pLVX-Tet3G, 100

83 ug/mL G418 was applied for 10 days. For cells expressing sgRNA, 5 ug/mL puromycin  
84 was applied 72 h after infection, for an additional 72 h.

## 85 **2.5. Western blot analysis and ELISA**

86 Total protein was extracted using RIPA lysis and extraction buffer with 1 mM PMSF.  
87 Total protein concentration was measured by BCA protein assay kit. For Western blot  
88 analysis, equal amounts of total protein were loaded in 8% SDS-PAGE and transferred  
89 onto a 0.22 um nitrocellulose membrane at 150 V, 90 min. The primary antibody rabbit  
90 anti-human Cas9 Polyclonal Antibody (Clontech) was diluted 1: 2500 and the  
91 secondary antibodies IRDye<sup>TM</sup>-800CW goat anti-rabbit and goat anti-mouse were  
92 diluted 1:12,000. Specific protein was detected by the Odyssey<sup>TM</sup>CLx Imaging system  
93 (Li-COR Bioscience).  $\alpha$ -Tubulin was used as an internal control. For ELISA, the dCas9  
94 protein was quantified using the CRISPR/Cas9 assay ELISA kit (Epigentek).

## 95 **2.6. RNA isolation and qPCR**

96 Total RNA was extracted using the Universal RNA Extraction Kit, and 1ug RNA was  
97 reverse-transcribed using the PrimeScript RT master mix. The reaction system included  
98 10 uL of SYBR Premix Ex Taq II, 6.4 uL of ddH<sub>2</sub>O, 0.8 uL each of forward and reverse  
99 primers at 10 uM and 2 uL of cDNA, with the following cycling conditions: 95 °C for 30  
100 s, and 45 cycles of 95 °C for 5 s, annealing temperature for 30 s, melting: 95 °C for 10 s,  
101 65 °C for 60 s, 97 °C for 1 s, cooling: 37 °C for 30 s (LightCycler<sup>®</sup> 96, Roche). For  
102 relative quantification, RNA expression was normalized to actin, and the PCR

103 amplification efficiency of primers was estimated by the slope of a standard curve.

104 qPCR primers are listed in Supplementary Table 2.

105

### 106 3. **Results**

107 Weissman lab lentiviral plasmid expressing KRAB-dCas9 under SFFV promoter were  
108 obtained and packaged in HEK293T cells with packaging plasmids, for obtaining cell  
109 clones that constitutively expressing KRAB-dCas9. To establish cell clones that express  
110 KRAB-dCas9 in doxycycline-inducible fashion, we replaced the SFFV promoter with  
111 doxycycline-inducible pTRE3G promoter (Fig. 1A). The Tet-on trans-activator  
112 rtetR-VP16 (Tet3G plasmid) was introduced into K562 cells by lentiviral infection, and  
113 the cells were selected using antibiotic G418. The inducible KRAB-dCas9 lentiviral  
114 plasmid was then packaged and used for infection into the G418 selected cells. The  
115 clonal K562 cells that either constitutively or inducible express KRAB-dCas9 were then  
116 selected by FACS utilizing the mCherry marker. To compare the cells with high or low  
117 KRAB-dCas9 expression level, we choose two clones, K562-idCas9 #49 and  
118 K562-idCas9 #60 from the 60 clones obtained from the inducible expressing cell  
119 selection. Similarly, K562-dCas9 #2 and K562-dCas9 #3 were chosen from the  
120 constitutive expressing clones for further study (Fig. 1B). Six different sgRNAs from  
121 two libraries were tested to determine CRISPRi knockdown efficiency by qPCR (Fig.  
122 1C).

123 We confirmed the inducible expression of KRAB-dCas9 in K562-idCas9 #49 by  
124 western blot and ELISA (Fig. 2A-B) and found that KRAB-dCas9 protein mainly  
125 localized in the nucleus, meeting expectation. mCherry median fluorescent intensity  
126 (MFI), the tag that co-expressed with KRAB-dCas9, exhibits a similar pattern as the  
127 ELISA signal, indicating that mCherry reflected the KRAB-dCas9 expression level.  
128 Both inducible clones have a dose-responsive increase in mCherry MFI upon  
129 doxycycline induction (Fig. 2C). The inducible KRAB-dCas9 expressing clones have  
130 lower expression levels compared to the constitutive clone K562-dCas9 #2, suggesting  
131 that inducible expression may not be able to reach the expression level of constitutive  
132 expression (Fig. 2D).

133 We assessed the knockdown efficiency of the four KRAB-dCas9 expressing clones  
134 using six different sgRNAs from two published CRISPRi libraries, the hCRISPRi-v2  
135 library and the Dolcetto library [9-10] (Supplementary Table 1). The relative position of  
136 the sgRNA to the transcription start site of the target genes varies (Fig. 3A), probably  
137 for meeting the specificity requirement. sgRNA was constructed and packaged into  
138 lentivirus and used for infection, and the cells expressing sgRNA were selected using  
139 puromycin. The knockdown efficiency was assessed by qPCR. The relative expression  
140 level of the target genes in four cell clones differed from each other, probably due to the  
141 single cloning procedure [11] (Fig. 3B). K562-dCas9 #2, the clone with the highest  
142 KRAB-dCas9 expression level knocked down most genes effectively (Fig. 3C); yet all  
143 other clones have relatively low or no knockdown efficiency or the target gene  
144 expression level increased (Fig. 3C). MMADHC, RPIA, ZNF148, LSM4, and LIMA1

145 genes have been knocked down in clone K562-dCas9 #2. The NPEPPS gene expression  
146 level increased in 3 cell clones, which could be due to the following reasons: NPEPPS  
147 is a puromycin responsive gene, and the puromycin selection after sgRNA transduction  
148 activated its expression; and/or the sgRNA is too far from the TSS. Similarly, the RPIA  
149 gene expression increased in the inducible clones, probably due to doxycycline  
150 treatment, as RPIA expression increased upon doxycycline treatment [12]. The  
151 KRAB-dCas9 protein expression level in K562-dCas9 #2 is at least 24-fold more than  
152 all other clones, indicating that high expression of KRAB-dCas9 is probably a  
153 prerequisite for effective CRISPRi knockdown. We analyzed whether knockdown  
154 efficiency is affected by the target gene expression level, and found no correlation (Fig.  
155 3D).

156 Utilizing K562-dCas9 #2, we assessed the impact of sgRNA expression level on  
157 knockdown efficiency. We infected K562-dCas9 #2 with sgRNA lentivirus at different  
158 MOI and determined the gene transfer rate using the BFP MFI, which is co-expressed  
159 with the sgRNA. We found an increase in the gene transfer rate, correlated with MOI,  
160 fitting a polynomial curve (Fig. 4A). Based on this curve, the gene transfer rate was  
161 34.1% at MOI 0.5, the usually used MOI for CRISPRi library, which is close to the  
162 previously reported gene transfer rate 28.6% at MOI 0.5 in K562 cells [13], confirming  
163 an effective lentiviral packaging and transduction. BFP MFI in positive sgRNA  
164 expression cells linearly correlated with MOI, indicating that the sgRNA level increased  
165 with increasing MOI (Fig. 4B). Correspondingly, a linear relationship was observed  
166 between the MOI and the knockdown efficiency, as expected (Fig. 4C). In our research,



167 based on the linear relationship between the MOI and the knockdown efficiency, around  
168 45% knockdown could be achieved by MOI 0.5 for the MMADHC gene (Fig. 4C).  
169 Moreover, we studied the relationship between the KRAB-dCas9 expression level and  
170 the knockdown efficiency and found that the KRAB-dCas9 level remained relatively  
171 constant across different MOI of sgRNA infection (CV=2.2%), which does not correlate  
172 with the knockdown efficiency (Fig. 4D).

173

#### 174 **4. Discussion**

175 We discovered that only cell clone with high KRAB-dCas9 expression can CRISPRi  
176 effectively knockdown target gene, suggesting that care shall be taken when choosing  
177 cells/cell clones for CRISPRi applications. The requirement of a high KRAB-dCas9  
178 level mandated selection of the cells after lentiviral infection. However, it is known that  
179 single cloning affected the transcription profile of the KRAB-dCas9 expressing cells,  
180 suggesting that poly-clonal cell populations are better in CRISPRi applications [11]. To  
181 meet the requirement of high KRAB-dCas9 expression, cell sorting shall be carried out,  
182 and more than one selection may be required, as the lentiviral transgene promoter could  
183 be methylated and transgene expression shut down in the continuous culture of the cells.  
184 For CRISPRi library screening, it can be challenging to obtain the cells with universal  
185 high KRAB-dCas9 expression level due to a large amount of cell required: the number  
186 of the cell in each group shall exceed  $1000 \times$  the sgRNA number in the library. A  
187 high-speed cell sorter is required, which is unfortunately not available in most

188 laboratories. CRISPRi library screening without such an instrument might have to rely  
189 on obtaining and expanding single-cell clone that stably expressing a high level of  
190 KRAB-dCas9. Effects on transcriptional profile brought by the single cloning procedure  
191 can be canceled out, though, as comparisons were made between groups using the same  
192 cell clone. Alternatively, with a more potent CRISPRi system, the high expression level  
193 of dCas9 fusion protein might not be necessary, and drug selection based on antibiotic  
194 resistance could be applied. The dCas9-KRAB-MeCP2 fusion protein is more effective  
195 in knockdown [14] and may offer such an option. Alternatively, iterative transfection  
196 could be applied to improve the expression of both dCas9 and sgRNA level [15].

197 We observed that once KRAB-dCas9 expression is high enough, CRISPRi efficiency  
198 depended on the sgRNA expression level. This observation corroborated the previous  
199 findings in the CRISPR system, that the nuclear concentration of the guide RNA is the  
200 limiting factor for efficient DNA targeting [6, 16], indicating that the dynamics of  
201 ribonucleoprotein formation and DNA targeting is probably similar between CRISPR  
202 and CRISPRi procedure. To improve the knockdown efficiency, it is critical to  
203 increasing the expression level of sgRNA, and a change of promotor could achieve this  
204 goal. Alternatively, since sgRNA is very unstable when it was not bound with Cas9  
205 protein [6], improvement of the sgRNA stability could potentially increase efficiency.  
206 The correlation between the sgRNA expression level and the knockdown efficiency of  
207 the CRISPRi system has indications for the CRISPRi library screening: inducible  
208 sgRNA will provide better control of the knockdown. It has been reported that inducible

209 sgRNA offered better control of knockout in the CRISPR system [17], again pointing to  
210 the similarities between the two tools.

211

212 **Acknowledgments** This work was supported by the National Natural Science  
213 Foundation of China (81860652).

214

## 215 **References**

- 216 1. Evers, B., K. Jastrzebski, J. Heijmans, W. Grenrum, R. L. Beijersbergen, and R.  
217 Bernards (2016) CRISPR knockout screening outperforms shRNA and CRISPRi in  
218 identifying essential genes. *Nat. Biotechnol.* 34: 631–633.
- 219 2. Gilbert, L. A., M. A. Horlbeck, B. Adamson, J. E. Villalta, Y. W. Chen, E. H.  
220 Whitehead, C. P. Guimaraes, B. Panning, H. L. Ploegh, M. C. Bassik, L. S. Qi, M.  
221 Kampmann, and J. S. Weissman (2014) Genome-Scale CRISPR-Mediated Control  
222 of Gene Repression and Activation. *Cell.* 159: 647-661.
- 223 3. Yeo, N. C., A. Chavez, A. Lancebyrne, Y. C. Chan, D. J. Menn, D. Milanova, C. C.  
224 Kuo, X. G. Guo, S. Sharma, A. Tung, R. J. Cecchi, M. Tuttle, S. Pradhan, E. T.  
225 Lim, N. Davidsohn, M. R. Ebrahimkhani, J. J. Collins, N. E. Lewis, S. Kiani, and G.  
226 M. Church (2018) An enhanced CRISPR repressor for targeted mammalian gene  
227 regulation. *Nat. Methods.* 15: 611-616.
- 228 4. Peng, H. Z., A. V. Ivanov, H. J. Oh, Y. C. Lau, and F. J. Rauscher (2009)

- 229 Epigenetic Gene Silencing by the SRY Protein Is Mediated by a KRAB-O Protein  
230 That Recruits the KAP1 Co-repressor Machinery. *J. Biol. Chem.* 284:  
231 35670-35680.
- 232 5. Hansen, J. C., R. P. Ghosh, and C. L. Woodcock (2010) Binding of the Rett  
233 syndrome protein, MeCP2, to methylated and unmethylated DNA and chromatin.  
234 *Iubmb Life.* 62: 732-738.
- 235 6. Ma, H. H., L. C. Tu, A. Naseri, M. Huisman, S. J. Zhang, D. Grunwald, and T.  
236 Pederson (2016) CRISPR-Cas9 nuclear dynamics and target recognition in living  
237 cells. *J. Cell Biol.* 214: 529-537.
- 238 7. Yang, S. Z., H. J. Shi, X. R. Chu, X. L. Zhou, and P. N. Sun (2016) A rapid and  
239 efficient polyethyleneimine-based transfection method to prepare lentiviral or  
240 retroviral vectors: useful for making iPS cells and transduction of primary cells.  
241 *Biotechnol. Lett.* 38: 1631-1641.
- 242 8. Kutner, R. H., X. Y. Zhang, and J. Reiser (2009) Production, concentration and  
243 titration of pseudotyped HIV-1-based lentiviral vectors. *Nat. Protoc.* 4: 495-505.
- 244 9. Horlbeck, M. A., L. A. Gilbert, J. E. Villalta, B. S. Adamson, R. A. Pak, Y. W.  
245 Chen, A. P. Fields, C. Y. Park, J. E. Corn, M. Kampmann, and J. S. Weissman  
246 (2016) Compact and highly active next-generation libraries for CRISPR-mediated  
247 gene repression and activation. *Elife.* 5:e19760.
- 248 10. Sanson, K. R., R. E. Hanna, M. Hegde, K. F. Donovan, C. Strand, M. E.  
249 Sullender, E. W. Vaimberg, A. Goodale, D. E. Root, F. Piccioni, and J. G. Doench  
250 (2018) Optimized libraries for CRISPR-Cas9 genetic screens with multiple

- 251 modalities. *Nat. Commun.* 9:5416.
- 252 11. Stojic, L., A. T. Lun, J. Mangei, P. Mascalchi, V. Quarantotti, A. R. Barr, C.  
253 Bakal, J. C. Marioni, F. Gergely, and D. T. Odom (2018) Specificity of RNAi,  
254 LNA and CRISPRi as loss-of-function methods in transcriptional analysis. *Nucleic  
255 Acids Res.* 46: 5950-5966.
- 256 12. Ahler, E., W. J. Sullivan, A. Cass, D. Braas, A. G. York, S. J. Bensinger, T. G.  
257 Graeber, and H. R. Christofk (2013) Doxycycline alters metabolism and  
258 proliferation of human cell lines. *Plos One.* 8: e64561.
- 259 13. Kustikova, O. S., A. Wahlers, K. Kuhlcke, B. Stahle, A. R. Zander, C. Baum, and B.  
260 Fehse (2003) Dose finding with retroviral vectors: correlation of retroviral vector  
261 copy numbers in single cells with gene transfer efficiency in a cell population.  
262 *Blood.* 102: 3934-3937.
- 263 14. Martella, A., M. Firth, B. J. Taylor, A. Goppert, E. M. Cuomo, R. G. Roth, A. J.  
264 Dickson, and D. I. Fisher (2019) Systematic Evaluation of CRISPRa and CRISPRi  
265 Modalities Enables Development of a Multiplexed, Orthogonal Gene Activation  
266 and Repression System. *ACS Synth. Biol.* 8: 1998-2006.
- 267 15. Shin, J., N. Lee, Y. Song, J. Park, T. J. Kang, S. C. Kim, G. M. Lee, and B. Cho  
268 (2015) Efficient CRISPR/Cas9-mediated Multiplex Genome Editing in CHO Cells  
269 via High-level sgRNA-Cas9 Complex. *Biotechnol. Bioprocess Eng.* 20: 825-833.
- 270 16. Yuen, G., F. J. Khan, S. J. Gao, J. M. Stommel, E. Batchelor, X. L. Wu, J. Luo  
271 (2017) CRISPR/Cas9-mediated gene knockout is insensitive to target copy number  
272 but is dependent on guide RNA potency and Cas9/sgRNA threshold expression

273 level. *Nucleic Acids Res.* 45:12039-12053.

274 17. Aubrey, B. J., G. L. Kelly, A. J. Kueh, M. S. Brennan, L. Oconnor, L. Milla, S.

275 Wilcox, L. Tai, A. Strasser, and M. J. Herold (2015) An Inducible Lentiviral Guide

276 RNA Platform Enables the Identification of Tumor-Essential Genes and

277 Tumor-Promoting Mutations In Vivo. *Cell Rep.* 10: 1422-1432.

278

279

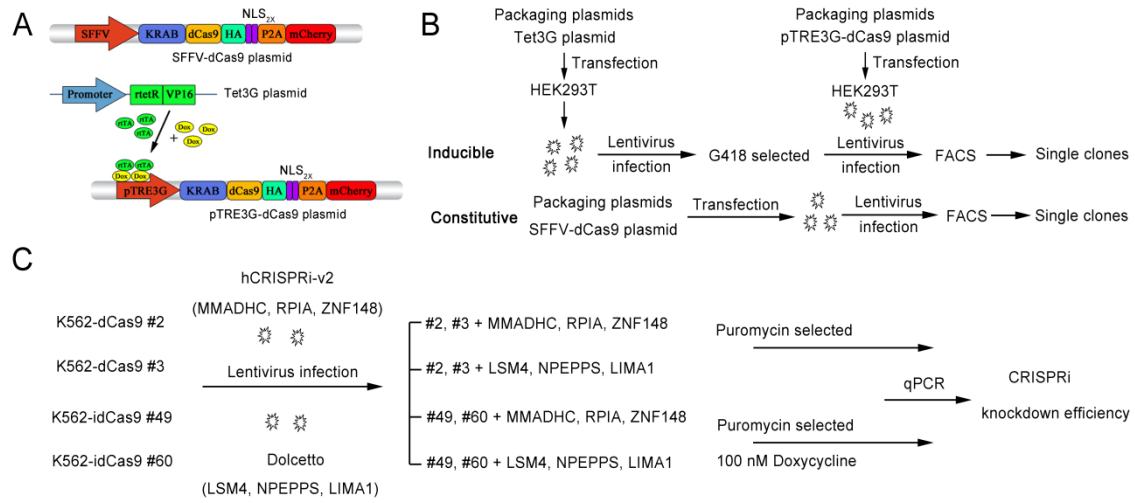

280

281 **Fig.1.** Overview of the experimental procedure. (A) Vectors for inducible and  
 282 constitutive KRAB-dCas9 expression. (B) Generate inducible and constitutive  
 283 KRAB-dCas9 expressing cell clones using lentivirus. (C) Infect cell clones with sgRNA  
 284 to determine CRISPRi knockdown efficiency.

285

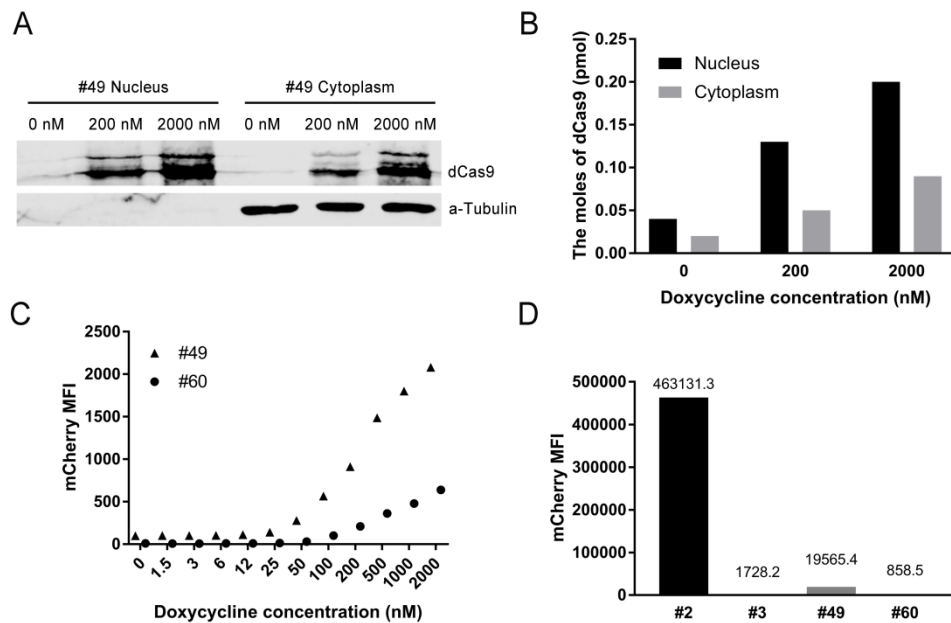

286

287 **Fig.2.** The expression of KRAB-dCas9 in inducible and constitutive clonal cells. **(A-B)**  
 288 Western blot and ELISA detection of nuclear and cytoplasmic KRAB-dCas9 in  
 289 K562-idCas9 #49 induced by 200 nM and 2000 nM doxycycline. **(C)** mCherry MFI in  
 290 K562-idCas9 #49, K562-idCas9 #60, in response to various doses of doxycycline.  
 291 Triangle indicated K562-idCas9 #49, round indicated K562-idCas9 #60. **(D)** mCherry  
 292 MFI of two inducible cell clones induced by 100 nM doxycycline and two constitutive  
 293 cell clones. #2: K562-dCas9 #2; #3: K562-dCas9 #3; #49: K562-idCas9 #49; #60:  
 294 K562-idCas9 #60.

295

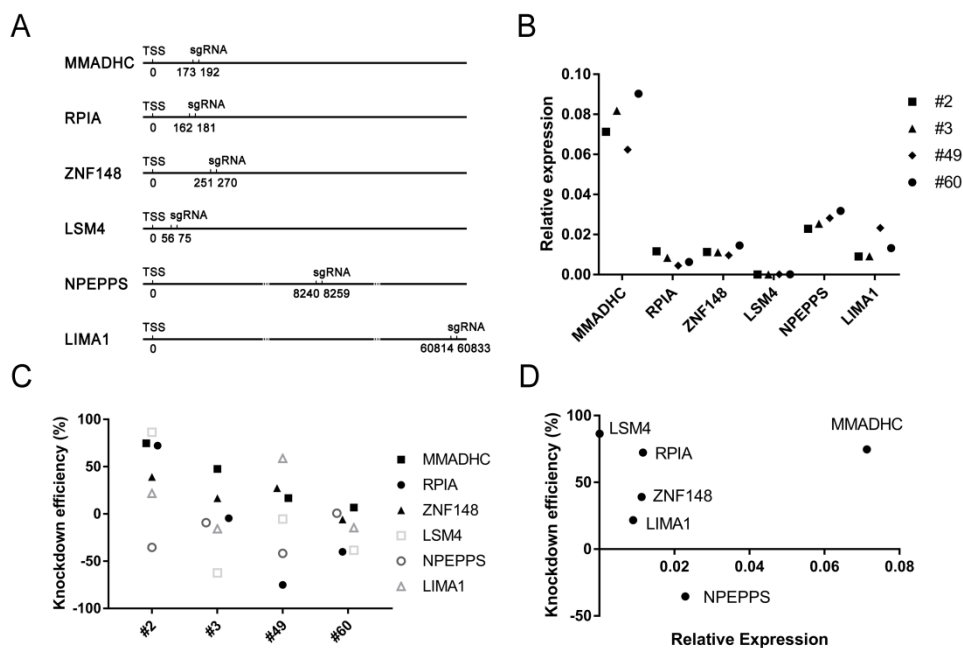

296

297 **Fig. 3.** Efficient CRISPRi knockdown depends on highly expressed KRAB-dCas9. **(A)**  
 298 The location of sgRNA of six genes at the promoter region, TSS: The transcription start  
 299 site. **(B)** The relative expression level of six genes in four clones, #2: K562-dCas9 #2;  
 300 #3: K562-dCas9 #3; #49: K562-idCas9 #49; #60: K562-idCas9 #60. **(C)** Knockdown



301 efficiency of six genes in four clones, #2: K562-dCas9 #2; #3: K562-dCas9 #3; #49:  
302 K562-idCas9 #49; #60: K562-idCas9 #60. **(D)** The relationship between target gene  
303 expression level and CRISPRi knockdown efficiency in K562-dCas9 #2. Triangle  
304 indicated hCRISPRi-v2 libraries. Round indicated Dolcetto library.

305

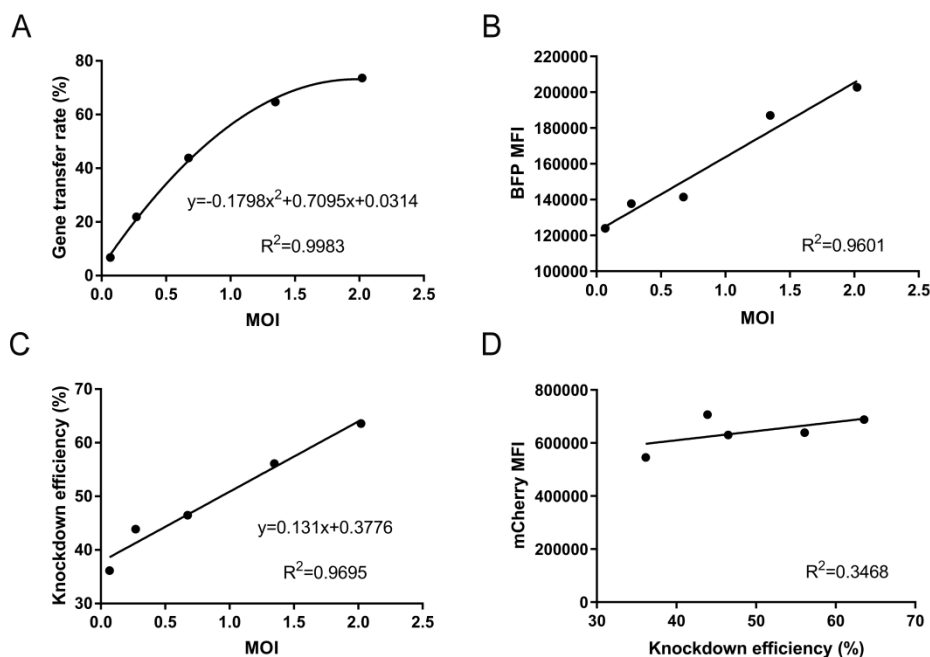

306

307 **Fig. 4.** CRISPRi knockdown efficiency correlated with sgRNA expression level. **(A)**  
308 Correlation between gene transfer rate and MOI of sgRNA infection of the MMADHC  
309 gene, determined by BFP MFI, in K562-dCas9 #2. **(B)** Correlation between BFP MFI in  
310 positive sgRNA expression cells and the MOI of sgRNA infection of the MMADHC  
311 gene in K562-dCas9 #2. **(C)** Correlation between knockdown efficiency and MOI of  
312 sgRNA infection of the MMADHC gene in K562-dCas9 #2. **(D)** Correlation between  
313 mCherry MFI and knockdown efficiency in K562-dCas9 #2.
